# Supplementary material for: Attenuating Effects of Pyrogallol-Phloroglucinol-6,6-Bieckol on Vascular Smooth Muscle Cell Phenotype Changes to Osteoblastic Cells and Vascular Calcification Induced by High Fat Diet
Source: PubMed Central journal article supplement (PMC7551448; doi:10.3390/nu12092777), 2020-09-11
Supplement: nutrients-12-02777-s001.pdf [file nutrients-12-02777-s001.pdf]

## Supplementary material

**Table S1.** List of primer for real-time quantitative real time polymerase chain reaction (qRT-PCR).

| Gene name<br>(Gene ID)                    |         | Primer sequence                         |
|-------------------------------------------|---------|-----------------------------------------|
| <i>Actb</i><br>(11461)                    | Forward | 5' - ACA AAG CTG TTC AGT GTC TCC A - 3' |
|                                           | Reverse | 5' - CTC CGT TTC CAG AAT ACA CAC A - 3' |
| <i>PKC</i><br>(18752)                     | Forward | 5' - GAT CTC CAT CGG ACT GTT CTT C - 3' |
|                                           | Reverse | 5' - ATT TTG ATG TGC CCT TCT GAG T - 3' |
| <i>TGF<math>\beta</math></i><br>(21808)   | Forward | 5' - CTG GCA GTA GCT CCC CTA TTT A-3'   |
|                                           | Reverse | 5' - ACC AGG GTA AAA ATC GAG ATG A-3'   |
| <i>BMP2</i><br>(12156)                    | Forward | 5' - ACA GTA GTT TCC AGC ACC GAA T-3'   |
|                                           | Reverse | 5' - TGT CCA ATA GTC TGG TCA CAG G- 3'  |
| <i>NF-<math>\kappa</math>B</i><br>(18033) | Forward | 5' - AGA AAT CCT ACC CAC AGG TCA A-3'   |
|                                           | Reverse | 5' - CAT TTG TGA CCA ACT GAA CGA T-3'   |
| <i>CBF<math>\alpha</math>1</i><br>(12393) | Forward | 5' - CCG GAA TGA TGA GAA CTA CTC C- 3'  |
|                                           | Reverse | 5' - TTG AAC CTG GCT ACT TGG TTT T- 3'  |
| <i>osteocalcin</i><br>(12097)             | Forward | 5' - GTG TGA GCT TAA CCC TGC TTG T- 3'  |
|                                           | Reverse | 5' - AGT GAT ACC GTA GAT GCG TTT G- 3'  |

### Supplementary methods

#### Alkaline phosphatase (ALP) activity assay

The Alkaline phosphatase (ALP) activity was determined in mouse serum using ALP activity assay kit (Abcam, UK). A quantity of 80  $\mu$ l of serum was reacted with 50  $\mu$ l of the 5 mM p-nitrophenyl phosphate as the substrate for 60-minute before ending the reaction with the stop solution. After that the absorbance of sample was measured at 405 nm on a microplate reader.

#### Calcium deposition assay

Calcium quantification was measured by using a commercial kit (Abcam, UK). A quantity of 50  $\mu$ l of serum sample was transferred into new wells. Chromogenic buffer was added and incubated for 5-minute. After that the absorbance of sample was detected at 575 nm on a microplate reader.

#### Alizarin red S staining

To validate calcium in aorta tissue, 0.2% alizarine red S staining conducted. The deparaffinized slides washed with distilled water twice and then the slide incubated with 0.2% alizarine red S incubated for 5-minute and dehydrated in acetone. The stained slides immersed with hematoxylin for nuclei counting and cleared with xylene and mounted with mounting medium (Sigma-Aldrich).

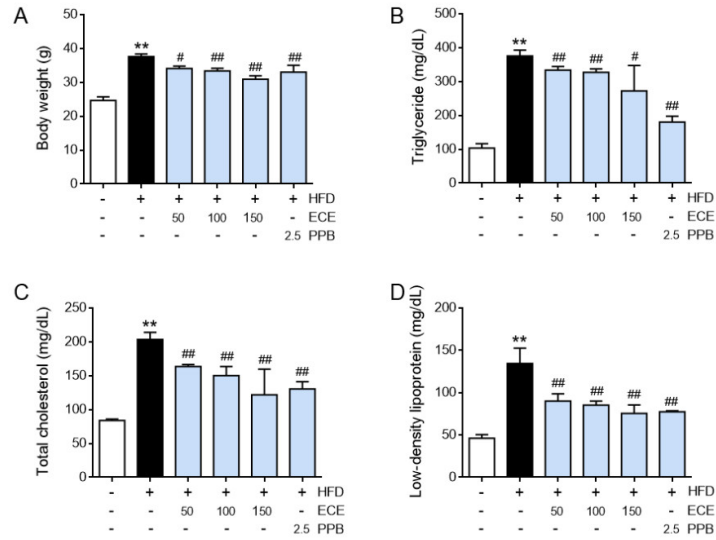

**Figure S1.** Changes of body weight, triglyceride, total cholesterol and LDL level of HFD-fed mice. C57BL/6N mice (male, 8 weeks of age) were bought and NFD or HFD-fed for 4 weeks and then 0.9% normal saline orally administered with NFD (NFD group) or HFD (HFD group) for the last 4 weeks. ECE (ECE group) of PPB (PPB group) orally administered with HFD for the last 4 weeks. At the end of the 8-week study period, (A) body weight measured and then all mice were sacrificed. (B) triglyceride, (C) total cholesterol and (D) LDL level measured in blood serum of mice. \*\*,  $p < 0.01$  vs. NFD/Saline group; #,  $p < 0.05$ , ##,  $p < 0.01$  vs. HFD/Saline group. ECE, *Ecklonia cava* extract; HFD, high-fat diet; LDL, low-density lipoproteins; NFD, normal fat diet; PPB, pyrogallol-phloroglucinol-6,6-bieckol.

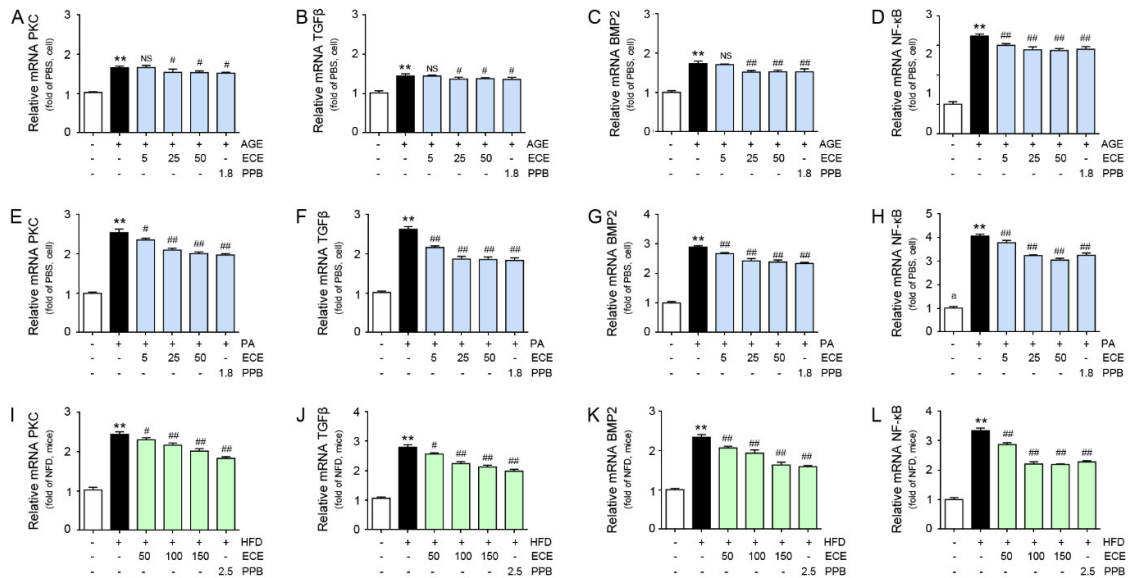

**Figure S2.** Inhibitory effects of ECE or PPB administration on vascular smooth muscle cell phenotypic switching to osteoblast-like cells mRNA levels of the phenotypic switching to osteoblast-like cell-related molecules PKC (A, E, I), TGFβ (B, F, J), BMP2 (C, G, K), NF-κB (D, H, L) were determined using qRT-PCR. 0, 25, 50 μg/ml ECE or 1.8 μg/ml PPB were incubated with AGE or PA-treated VSMC (cell) and 50, 100, 250 mg/kg ECE or 2.5 mg/kg PPB administered with HFD-fed mice. \*\*,  $p < 0.01$  vs. PBS or NFD/Saline group; #,  $p < 0.05$ , ##,  $p < 0.01$  vs. AGE, PA or HFD/Saline group. AGE, advanced glycation end products; BMP2, bone morphogenetic protein 2; ECE, *Ecklonia cava* extract; HFD, high-fat diet; NFD, normal fat diet; NF-κB, nuclear factor kappa-light-chain-enhancer of activated B cells; NS, non-

signal; PA, palmitate; PKC, protein kinase C; PPB, pyrogallol-phloroglucinol-6,6-bieckol; qRT-PCR, real-time quantitative real time polymerase chain reaction; TGF $\beta$ , transforming growth factor beta; VSMC, vascular smooth muscle cell.

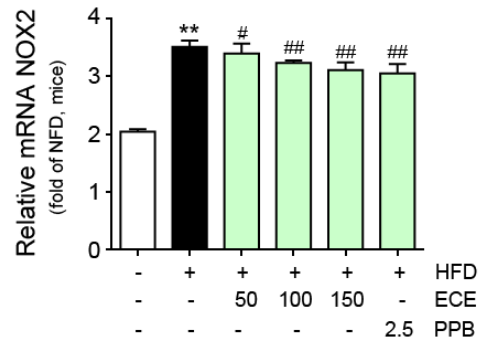

**Figure S3.** Inhibitory effects of ECE or PPB administration on NOX2 expression. mRNA levels of NOX2 was determined using qRT-PCR. 50, 100, 150 mg/kg ECE or 2.5 mg/kg PPB were administrated with HFD-fed mice. The asterisk (\*) indicates difference between some groups vs. NFD group and the sharp (#) indicates difference between some groups vs. HFD group. \*\*,  $p < 0.01$  vs. NFD/Saline group; #,  $p < 0.05$ , ##,  $p < 0.01$  vs. HFD/Saline group. ECE, *Ecklonia cava* extract; HFD, high-fat diet; NFD, normal fat diet; NOX2, nicotinamide adenine dinucleotide phosphate oxidase 2; PPB, pyrogallol-phloroglucinol-6,6-bieckol; qRT-PCR, real-time quantitative real time polymerase chain reaction.

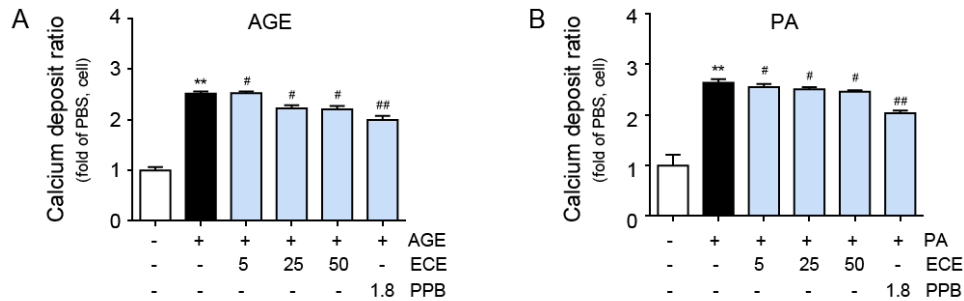

**Figure S4.** Inhibitory effects of ECE or PPB administration on calcium deposition of vascular smooth muscle cells. 0, 25, 50  $\mu$ g/ml ECE or 1.8  $\mu$ g/ml PPB were incubated with AGE (A) or PA-treated VSMC (B) and Calcium deposition was calculated using the calcium deposition assay. \*\*,  $p < 0.01$  vs. PBS group; #,  $p < 0.05$ , ##,  $p < 0.01$  vs. AGE or PA or group. AGE, advanced glycation end products; ECE, *Ecklonia cava* extract; PA, palmitate; PPB, pyrogallol-phloroglucinol-6,6-bieckol; VSMC, vascular smooth muscle cell.
